# Supplementary material for: Modulation of Symbiotic Compatibility by Rhizobial Zinc Starvation Machinery
Source: PubMed Central journal article supplement (PMC7029138; doi:10.1128/mbio.03193-19), 2020-02-18
Supplement: mBio.03193-19-sf001.pdf [file mBio.03193-19-sf001.pdf]

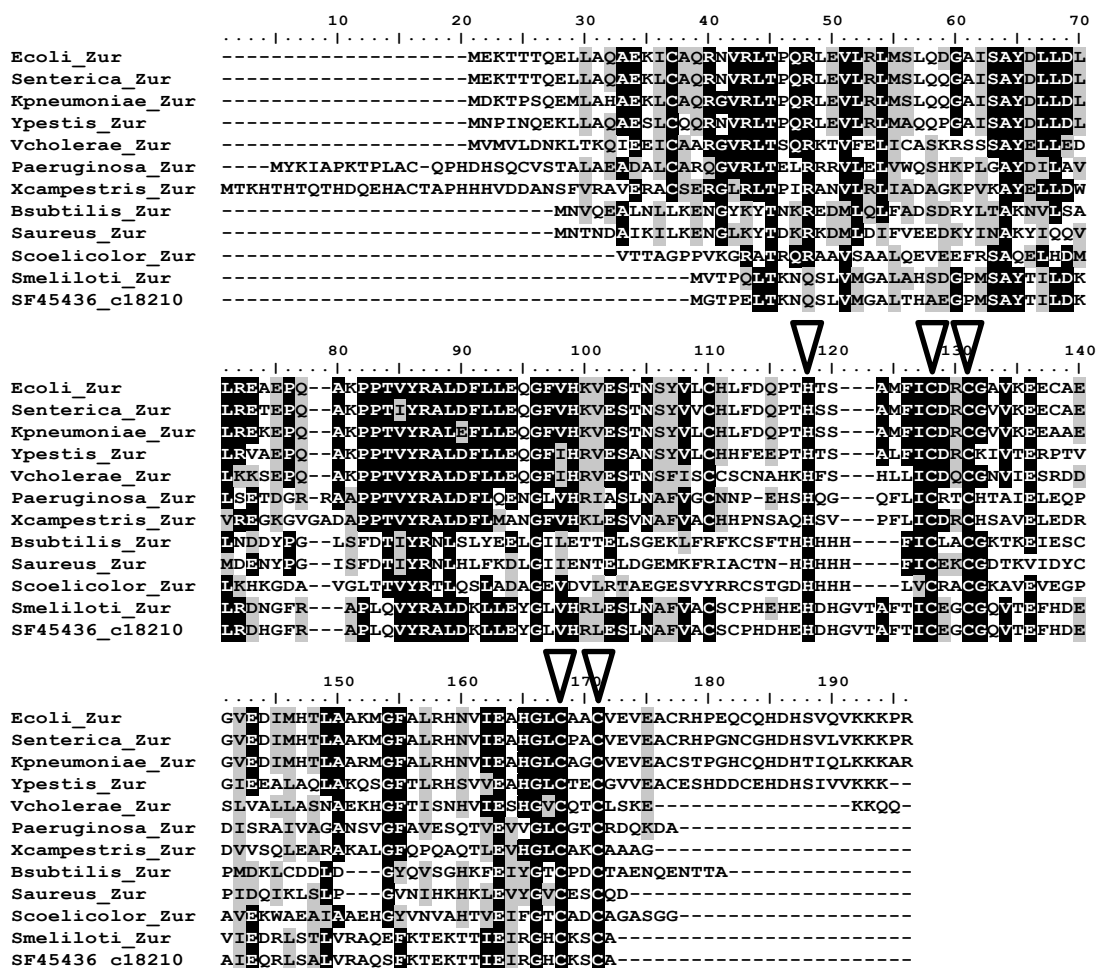

**Fig. S1. Sequence alignment of c18210 with other bacterial Zur proteins.** The protein sequence of SF45436\_c18210 was aligned with Zur proteins from the following bacteria: *Escherichia coli*, *Salmonella enterica*, *Klebsiella pneumoniae*, *Yersinia pestis*, *Vibrio cholerae*, *Pseudomonas aeruginosa*, *Xanthomonas campestris*, *Bacillus subtilis*, *Staphylococcus aureus* using ClustalW. Five conserved residues (H77, C87, C90, C128, and C130) that are critical for the specific binding to zinc ions are indicated with triangles.
