# Supplementary material for: Modulation of Symbiotic Compatibility by Rhizobial Zinc Starvation Machinery
Source: PubMed Central journal article supplement (PMC7029138; doi:10.1128/mbio.03193-19), 2020-02-18
Supplement: mBio.03193-19-sf002.pdf [file mBio.03193-19-sf002.pdf]

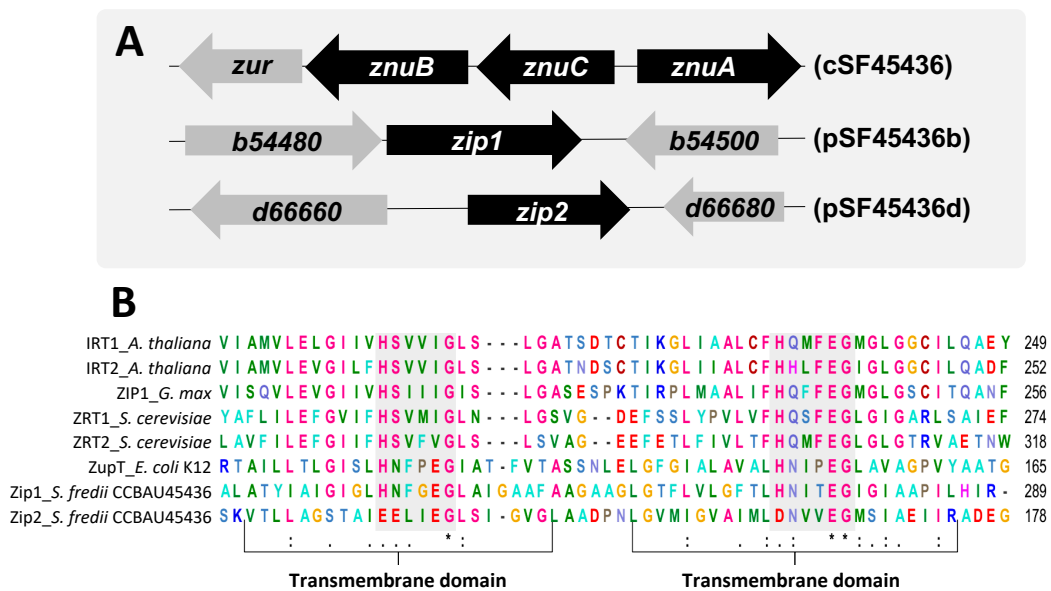

**Fig. S2. Putative zinc uptake transporters encoded in the multipartite genome of *S. fredii* CCBAU45436.** (A) Genes encoding putative transporters ZnuABC, Zip1, and Zip2 are shown in black. These genes are located on three of the five replicons of CCBAU45436: cSF45436 (chromosome), pSF45436b (chromid), and pSF45436d (an accessory plasmid). (B) Zip1 and Zip2 of CCBAU45436 harbor two characterized conserved regions (shaded) in two transmembrane domains of ZIP family proteins. The partial protein sequences of Zip1 (SF45436\_b54490) and Zip2 (SF45436\_d66670) were aligned with ZIP protein homologs from *Arabidopsis thaliana*, *Saccharomyces cerevisiae*, *Glycine max* and *Escherichia coli*.
