# Supplementary material for: Modulation of Symbiotic Compatibility by Rhizobial Zinc Starvation Machinery
Source: PubMed Central journal article supplement (PMC7029138; doi:10.1128/mbio.03193-19), 2020-02-18
Supplement: mBio.03193-19-sf003.pdf [file mBio.03193-19-sf003.pdf]

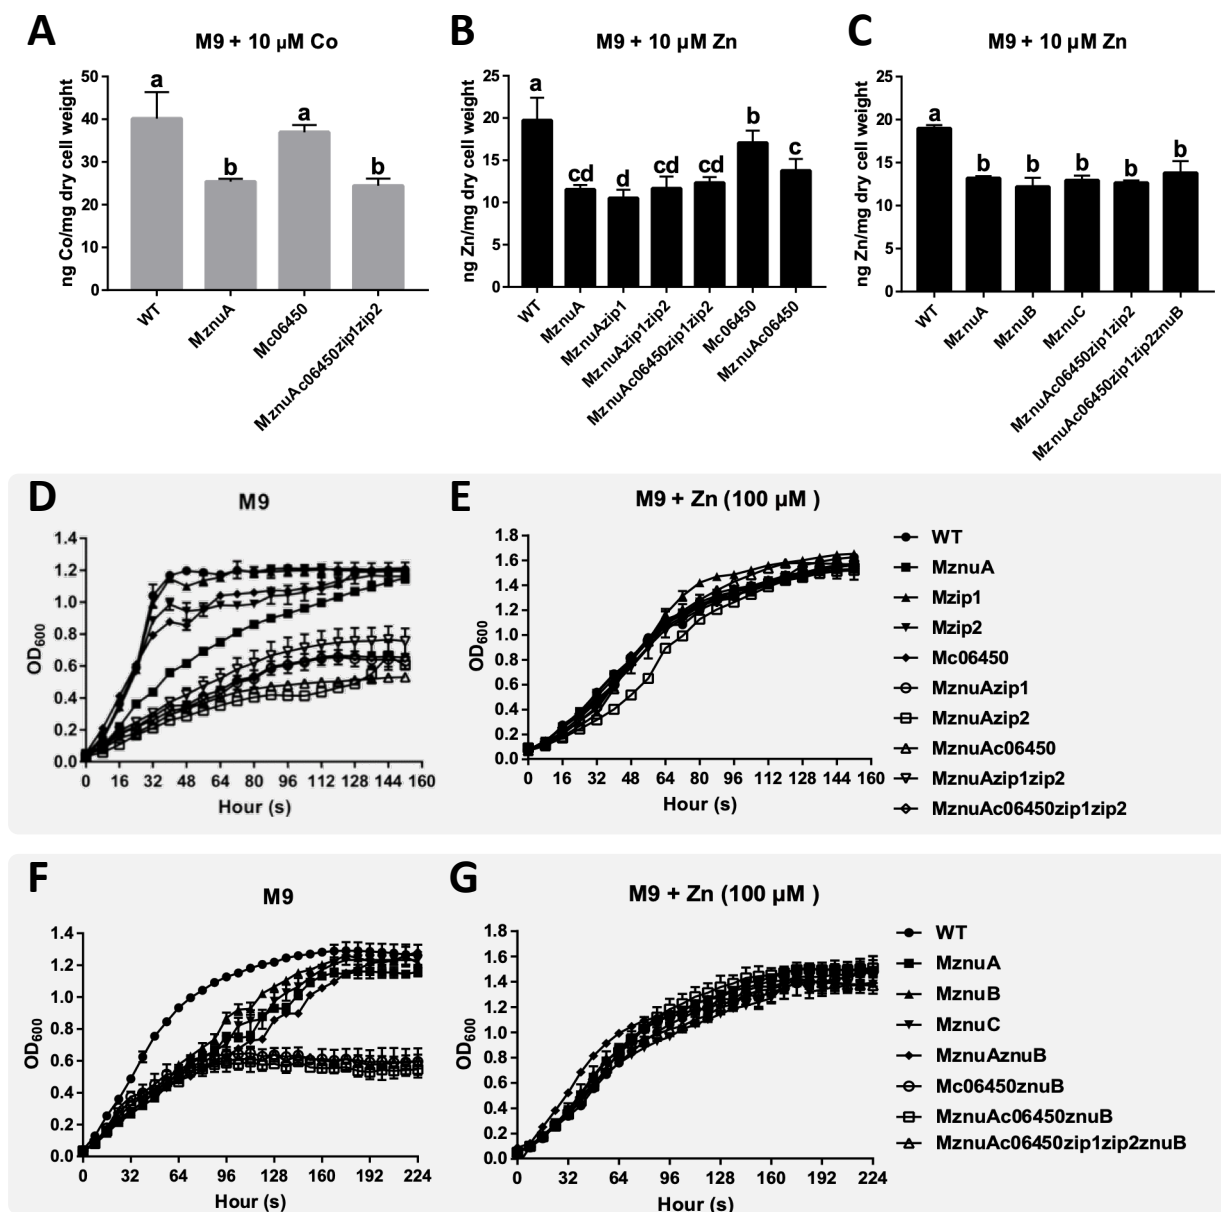

**Fig. S3. Znu as the major zinc uptake system under zinc-deplete conditions.** (A) Intracellular cobalt content of strains grown in M9 medium supplied with 10  $\mu$ M  $\text{CoCl}_2$ . (B-C) Intracellular zinc content of strains grown in M9 medium supplied with 10  $\mu$ M  $\text{ZnSO}_4$ . (D-G) Growth curves determined in M9 medium without (C, F) or with 100  $\mu$ M  $\text{ZnSO}_4$  (D, G). Values are mean  $\pm$  SD of biological triplicates. Different letters indicate significant difference (Duncan test,  $\alpha = 0.05$ ).
