# Supplementary material for: Modulation of Symbiotic Compatibility by Rhizobial Zinc Starvation Machinery
Source: PubMed Central journal article supplement (PMC7029138; doi:10.1128/mbio.03193-19), 2020-02-18
Supplement: mBio.03193-19-sf004.pdf [file mBio.03193-19-sf004.pdf]

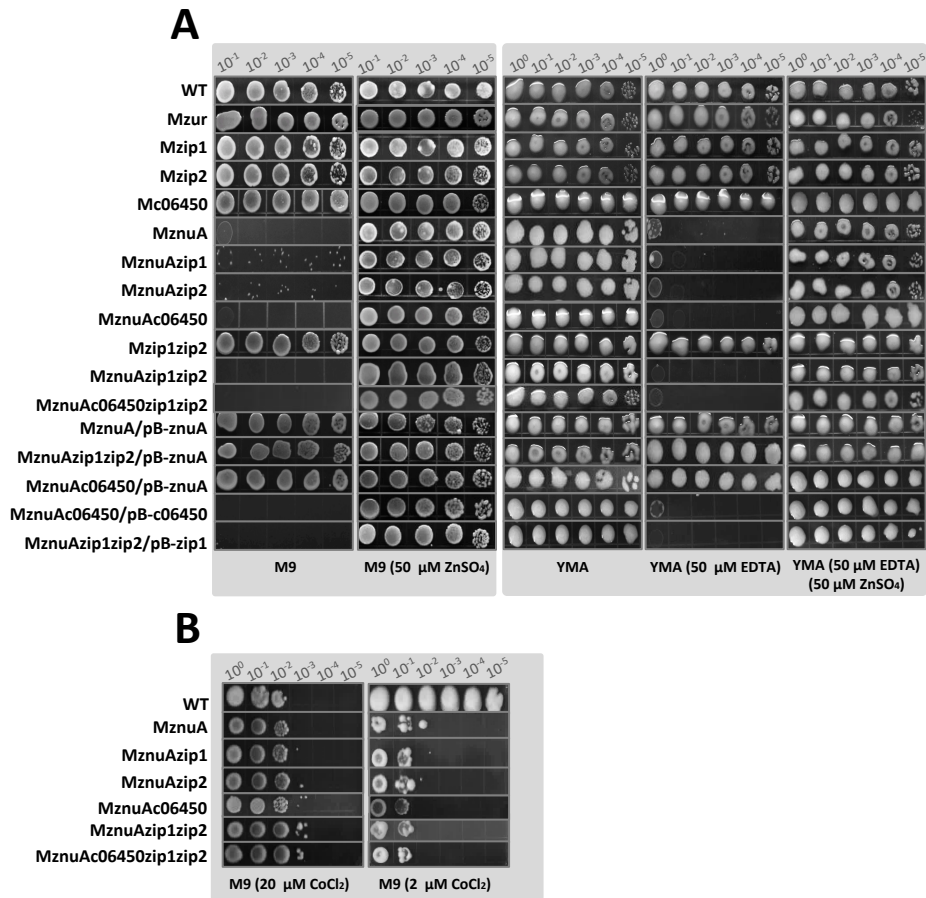

**Fig. S4. Znu is essential for low zinc adaptation. (A)** Cell suspension of  $\text{OD}_{600} = 1.0$  was serially diluted and spotted onto plates with the M9 minimal medium with or without  $50 \mu\text{M}$   $\text{ZnSO}_4$ , or plates with the YMA medium supplemented with  $50 \mu\text{M}$  EDTA, or  $50 \mu\text{M}$  EDTA and  $50 \mu\text{M}$   $\text{ZnSO}_4$ . Plasmids pB-*znuA*, pB-*zip1* and pB-*c06450* were used in complementation experiments. **(B)** Growth defects of *znu* mutants on M9 plates can be partially restored by adding  $\text{CoCl}_2$ . Cell suspension of  $\text{OD}_{600} = 1.0$  was serially diluted and spotted onto plates with the M9 medium supplemented with  $20 \mu\text{M}$  or  $2 \mu\text{M}$   $\text{CoCl}_2$ .
