# Supplementary material for: Modulation of Symbiotic Compatibility by Rhizobial Zinc Starvation Machinery
Source: PubMed Central journal article supplement (PMC7029138; doi:10.1128/mbio.03193-19), 2020-02-18
Supplement: mBio.03193-19-sf005.pdf [file mBio.03193-19-sf005.pdf]

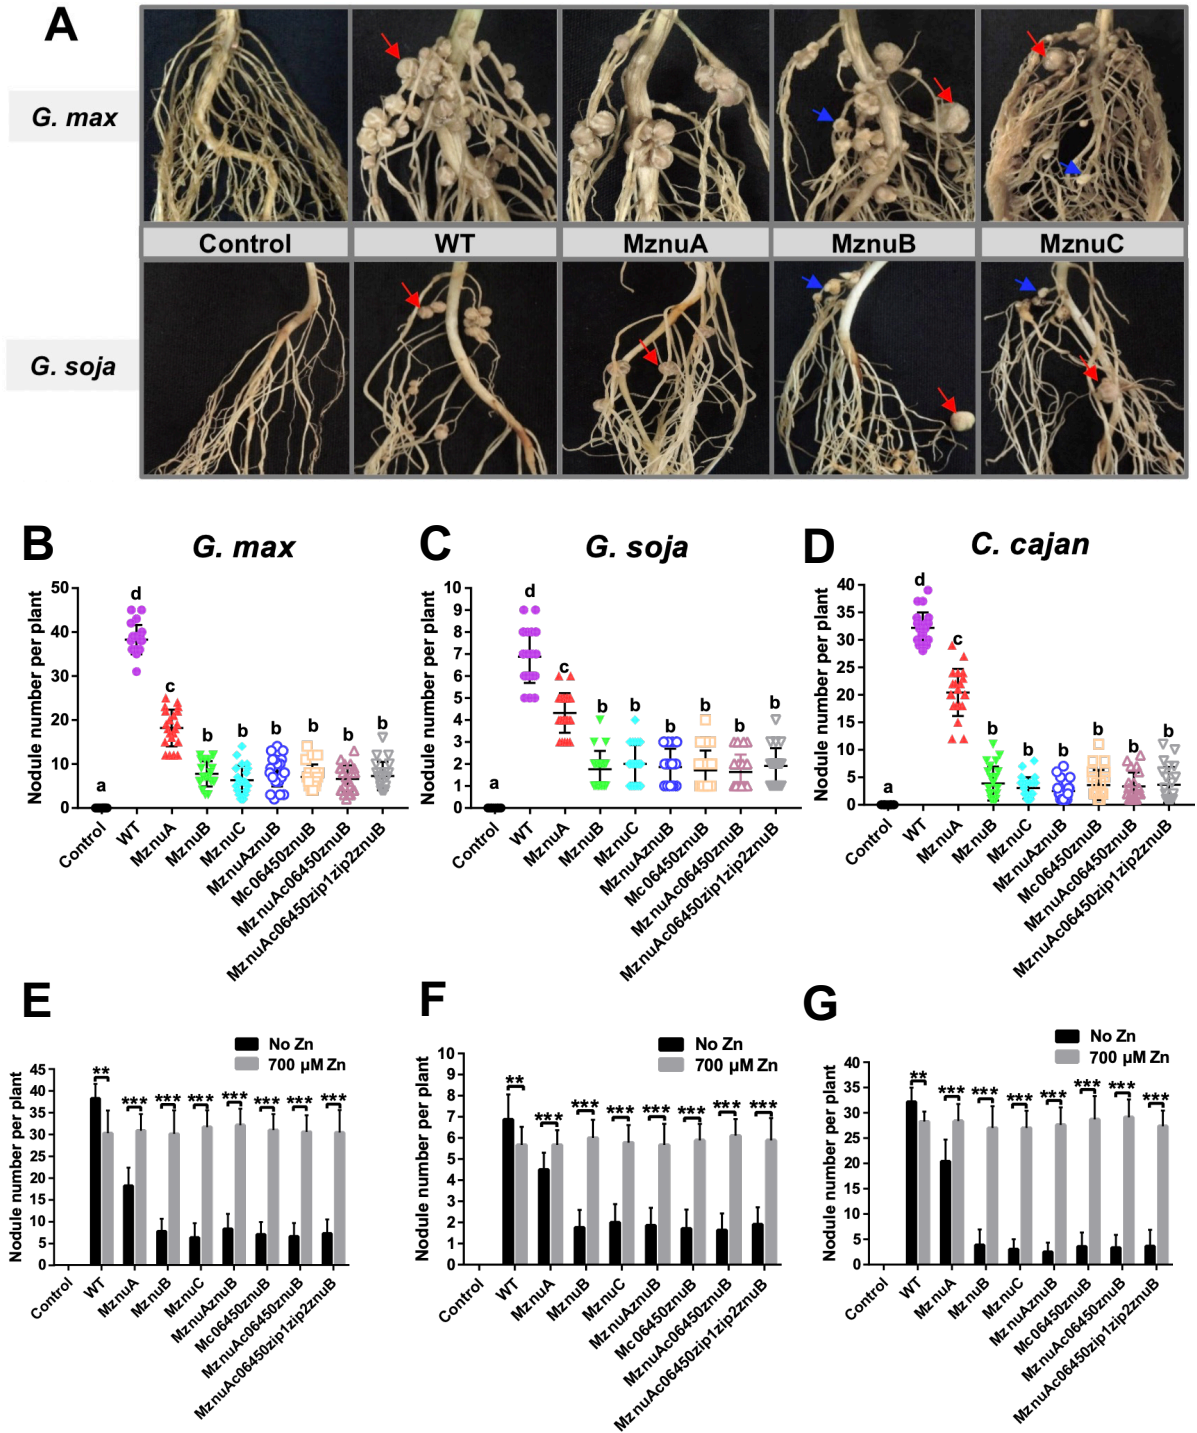

**Fig. S5. Comparative analysis of nodulation phenotypes of mutants lacking different *znu* genes.** (A) Representative photos showing infected nodules (red arrows) and bumps (blue arrows) observed on roots of *G. max* and *G. soja* inoculated with corresponding strains. (B-D) Number of infected nodules per plant of *G. max* (B), *G. soja* (C) and *C. cajan* (D). Means  $\pm$  SD are based on 20-30 scored plants from three independent experiments. Different letters indicate significant difference (Duncan test,  $\alpha = 0.05$ ). (E-G) Number of infected nodules per plant of *G. max* (E), *G. soja* (F) and *C. cajan* (G) inoculated with corresponding strains under conditions with or without 700  $\mu$ M ZnSO<sub>4</sub> in vermiculite moistened with low-N nutrient solution. Means  $\pm$  SD are based on 20-30 scored plants from three independent experiments (*t* test; \*\*,  $P < 0.01$ ; \*\*\*,  $P < 0.001$ ).
