# Supplementary material for: Modulation of Symbiotic Compatibility by Rhizobial Zinc Starvation Machinery
Source: PubMed Central journal article supplement (PMC7029138; doi:10.1128/mbio.03193-19), 2020-02-18
Supplement: mBio.03193-19-sf006.pdf [file mBio.03193-19-sf006.pdf]

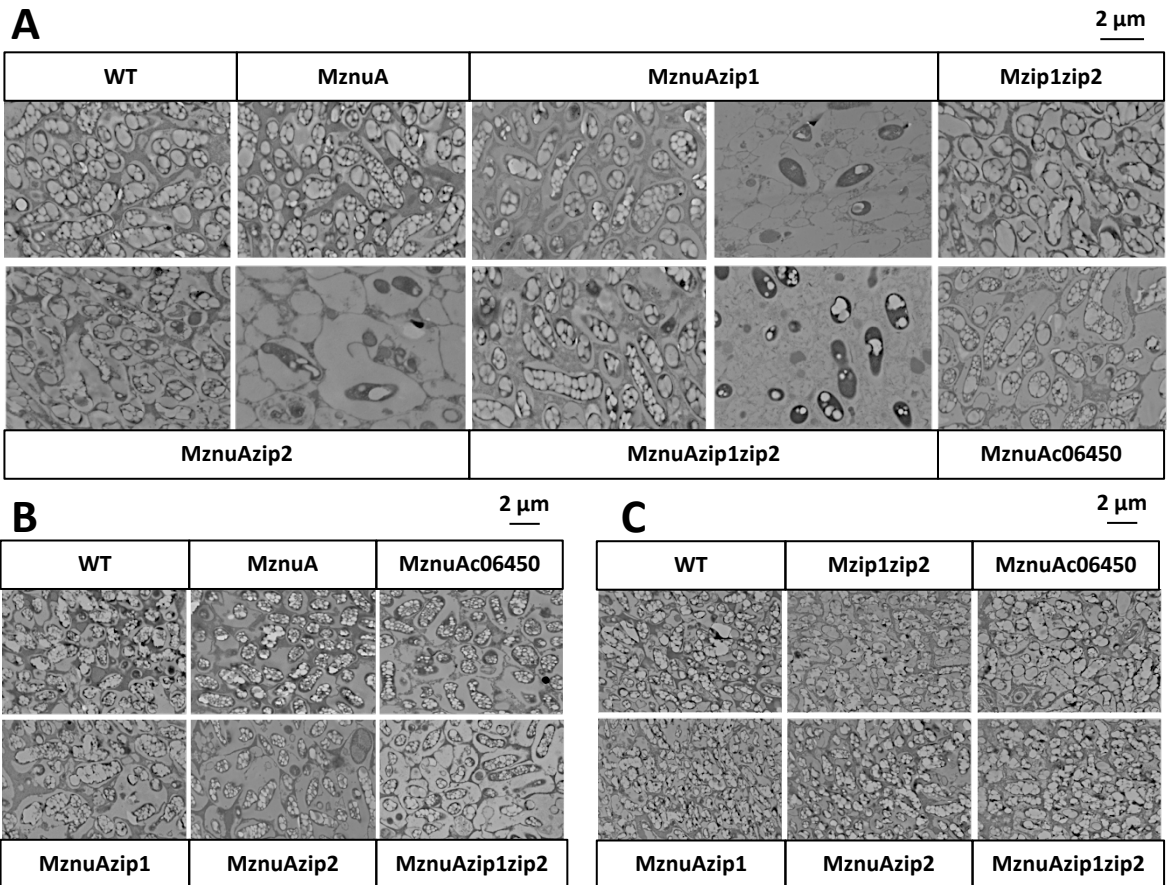

**Fig. S6. Ultrathin sections of *G. max* (A), *G. soja* (B) and *C. cajan* (C) nodules.** Pictures of ultrathin sections of 40 days post inoculation (dpi) nodules infected by CCBAU45436 and representative mutants were obtained by transmission electron microscopy. Scale bar indicates 2 μm.
