# Supplementary material for: Modulation of Symbiotic Compatibility by Rhizobial Zinc Starvation Machinery
Source: PubMed Central journal article supplement (PMC7029138; doi:10.1128/mbio.03193-19), 2020-02-18
Supplement: mBio.03193-19-sf007.pdf [file mBio.03193-19-sf007.pdf]

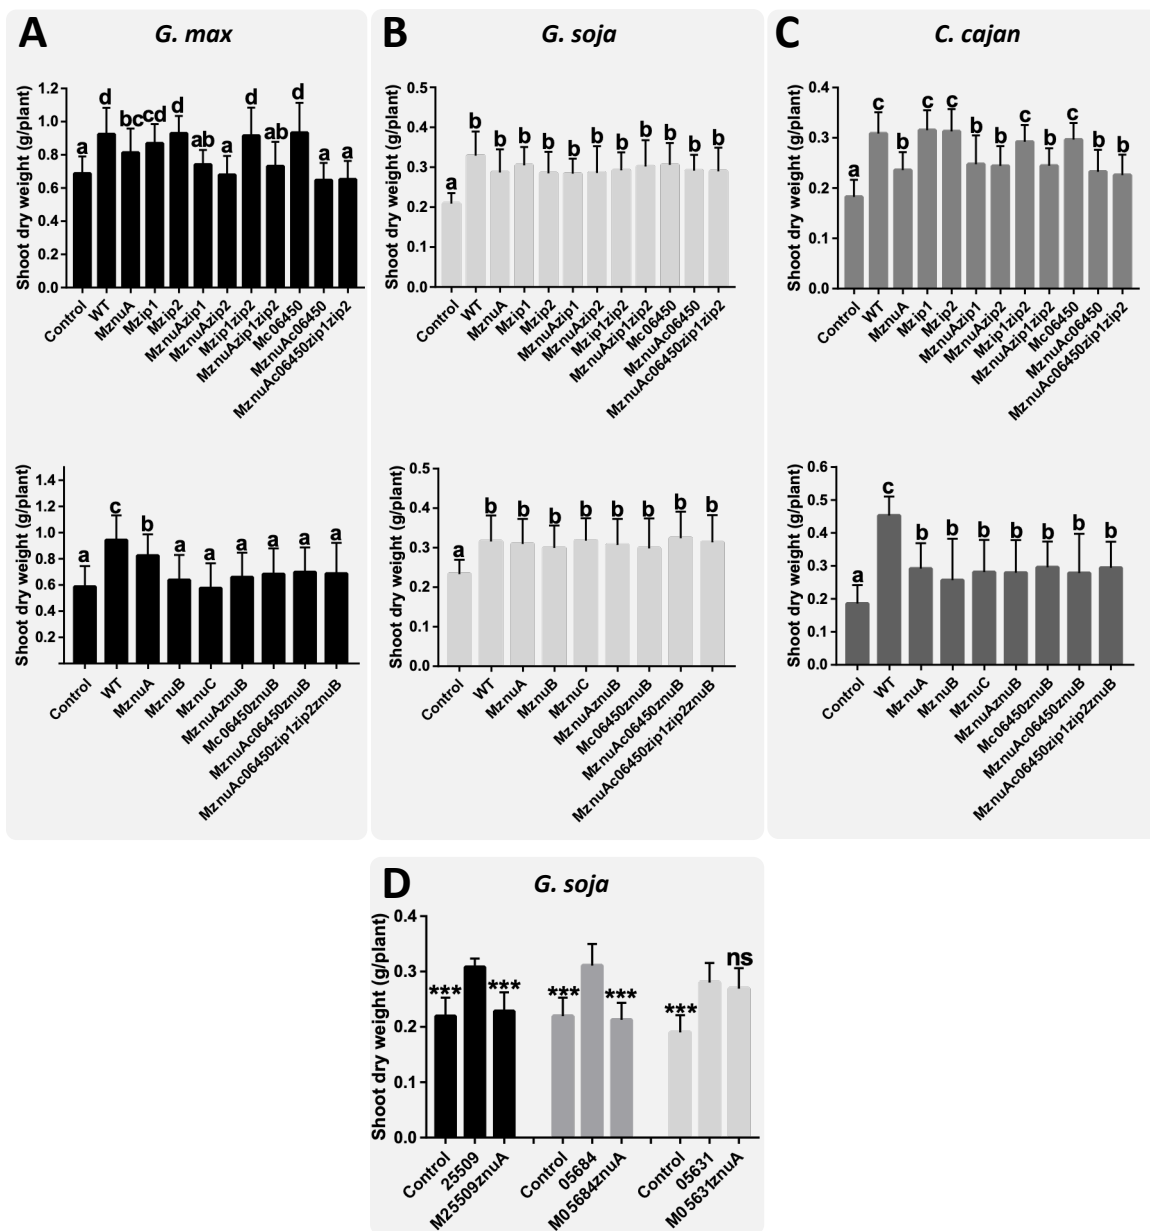

**Fig. S7. Symbiotic performance of mutants lacking individual or multiple zinc transporter genes. (A-C)** Shoot dry weight of *G. max* (A), *G. soja* (B) and *C. cajan* (C) plants inoculated with *S. fredii* CCBAU45436 and its derivatives lacking individual or multiple zinc transporter genes. (D) Shoot dry weight of *G. soja* plants inoculated with CCBAU25509/CCBAU05684/CCBAU05631 and their *znuA* mutants. Means  $\pm$  SD are based on 20-30 scored plants from three independent experiments. Different letters indicate significant difference (Duncan test, alpha = 0.05). \*\*\*,  $P < 0.001$  in  $t$  test of the mean comparison with that of wild-type *S. fredii* CCBAU25509, *S. sojae* CCBAU05684 or *Sinorhizobium* sp. CCBAU05631; ns, nonsignificant.
