# Supplementary material for: Modulation of Symbiotic Compatibility by Rhizobial Zinc Starvation Machinery
Source: PubMed Central journal article supplement (PMC7029138; doi:10.1128/mbio.03193-19), 2020-02-18
Supplement: mBio.03193-19-sf008.pdf [file mBio.03193-19-sf008.pdf]

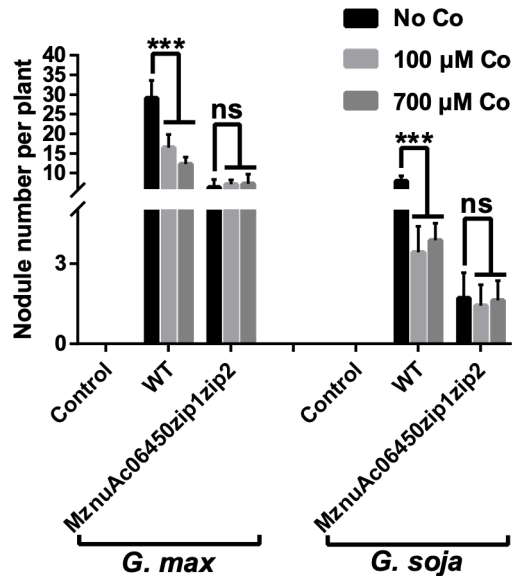

**Fig. S8. Nodulation defects of mutants lacking *znu* cannot be recovered by replete cobalt.** Nodule number per plant of *Glycine max* (A) and *Glycine soja* (B) were recorded under conditions with different concentrations of cobalt being supplied. Means  $\pm$  SD are based on more than 20-30 scored plants. Significant effects of cobalt addition are indicated (*t* test; ns,  $P > 0.05$ ; \*\*\*,  $P < 0.001$ ). There were no nodules formed on *Cajanus cajan* plants inoculated with either WT or the mutant when cobalt was added.
